# Supplementary material for: Combined Mass Spectrometry-Based Metabolite Profiling of Different Pigmented Rice (Oryza sativa L.) Seeds and Correlation with Antioxidant Activities
Source: PubMed Central journal article supplement (PMC6271636; doi:10.3390/molecules191015673), 2014-09-29
Supplement: molecules-19-15673-s001.pdf [file molecules-19-15673-s001.pdf]

## Supplementary Materials

**Table S1.** List of tentatively identified secondary metabolites of nine different Korean species of rice seeds using UPLC-Q-TOF-MS.

| Tentative Identification <sup>a</sup>                   | UPLC-Q-TOF-MS         |                              |         |                                                   |              | LC-ESI-MS/MS |                                          |                                   |                  |                   |
|---------------------------------------------------------|-----------------------|------------------------------|---------|---------------------------------------------------|--------------|--------------|------------------------------------------|-----------------------------------|------------------|-------------------|
|                                                         | RT <sup>b</sup> (min) | Measured Mass ( <i>m/z</i> ) |         | Elemental Composition (Formular)                  | $\Delta$ ppm | iFit         | MS <sup>n</sup> Fragments ( <i>m/z</i> ) | Adduct                            | $\lambda_{\max}$ | Ref. <sup>c</sup> |
| Cyanidin-3-glucoside                                    | 3.11                  | 447.09                       | 449.108 | C <sub>21</sub> H <sub>21</sub> O <sub>11</sub>   | -3.3         | 0.11         | 449 > 287 > 213 (+)                      | [M+H] <sup>+</sup>                | 277, 515         | std <sup>d</sup>  |
| Peonidin-3-glucoside                                    | 3.35                  | 461.108                      | 463.127 | C <sub>22</sub> H <sub>23</sub> O <sub>11</sub>   | 2.6          | 0.72         | 463 > 301 > 286 (+)                      | [M+H] <sup>+</sup>                | 276, 517         | std               |
| Pronathocyanidin dimer                                  | 3.1                   | 577.133                      | 579.153 | C <sub>30</sub> H <sub>27</sub> O <sub>12</sub>   | 5.2          | 1.96         | 579 > 453 > 301(+)                       | [M+H] <sup>+</sup>                | 241, 278         | [6,45]            |
| Proanthocyanidin trimer                                 | 3.14                  | 865.191                      | 867.218 | C <sub>45</sub> H <sub>39</sub> O <sub>18</sub>   | 1.4          | 3.06         | 865 > 695 > 543 (-)                      | [M-H] <sup>-</sup>                | 242, 277         | [6,45]            |
| Catechin *                                              | 3.23                  | 289.071                      | 291.093 | C <sub>15</sub> H <sub>13</sub> O <sub>6</sub>    | 2.1          | 0.84         | 289 > 253 > 203 (-)                      | [M-H] <sup>-</sup>                | 241, 277         | std               |
| Apigenin-6- <i>C</i> -glucosyl-8- <i>C</i> -arabinoside | 3.64                  | 563.138                      | 565.164 | C <sub>26</sub> H <sub>27</sub> O <sub>14</sub>   | 0.4          | 0.51         | 563 > 473 > 383 (-)                      | [M-H] <sup>-</sup>                | 273, 308         | [27,28]           |
| Tricin- <i>O</i> -rhamnoside- <i>O</i> -hexoside        | 4.18                  | 637.172                      | 639.199 | C <sub>29</sub> H <sub>35</sub> O <sub>16</sub>   | 6.3          | 2.4          | 639 > 493 > 331 (+)                      | [M+H] <sup>+</sup>                | 272, 313         | [29]              |
| Pinellic acid                                           | 5.82                  | 329.233                      | 353.232 | C <sub>18</sub> H <sub>33</sub> O <sub>5</sub>    | -7.6         | 0.03         | 329 > 311,229,171 > 293 (-)              | [M-H] <sup>-</sup>                | 231, 313         | [30]              |
| LysoPC 14:0                                             | 7.71                  | 512.297                      | 468.312 | C <sub>23</sub> H <sub>47</sub> NO <sub>9</sub> P | 2            | 1.08         | 512 > 452 > 227 (-)                      | [M+FA-H] <sup>-</sup>             | 239, 264         | [43,44]           |
| LysoPC 18:2                                             | 8.28                  | 564.334                      | 520.343 | C <sub>27</sub> H <sub>51</sub> NO <sub>9</sub> P | -1.9         | 2.44         | 564 > 504 > 279 (-)                      | [M+FA-H] <sup>-</sup>             | 239, 271         | [43,44]           |
| LysoPC 16:0                                             | 8.75                  | 480.31                       | 496.342 | C <sub>24</sub> H <sub>51</sub> NO <sub>7</sub> P | 2            | 0.16         | 496 > 184 > 86 (+)                       | [M+CH <sub>3</sub> ] <sup>+</sup> | 241, 304         | [43,44]           |
| LysoPC 18:1                                             | 8.98                  | 566.346                      | 522.359 | C <sub>27</sub> H <sub>53</sub> NO <sub>9</sub> P | -3           | 0.18         | 566 > 506 > 281 (-)                      | [M+FA-H] <sup>-</sup>             | 237, 273         | [43,44]           |

<sup>a</sup> Identified metabolites based on VIP > 0.7, and a *p*-value < 0.05 from the PLS-DA model. <sup>b</sup> Retention time. <sup>c</sup> Reference. <sup>d</sup> Standard compound. \* Target identified.

**Table S2.** Significantly different primary metabolites identified from nine different species of rice seeds extracts using GC-TOF-MS.

| RT <sup>a</sup> (min)             | Metabolites <sup>b</sup> | MS Fragment Ions ( <i>m/z</i> )      | Ref. <sup>c</sup> |
|-----------------------------------|--------------------------|--------------------------------------|-------------------|
| <i>Amino acids</i>                |                          |                                      |                   |
| 6.44                              | Valine                   | 73-144-75-147-59-74-100-218-145-58   | STD               |
| 7.24                              | Proline                  | 73-174-86-147-59-100-75-133-74-175   | STD               |
| 7.81                              | Serine                   | 73-57-117-75-101-147-74-219-218-59   | STD               |
| 8.05                              | Threonin                 | 73-147-75-55-74-59-133-101-148-233   | STD               |
| 9.2                               | Aspartic acid            | 73-156-174-75-147-86-59-74-100-175   | STD               |
| 9.26                              | GABA                     | 73-147-75-220-59-100-218-74-84-55    | STD               |
| 9.97                              | Glutamic acid            | 73-218-75-192-147-74-59-91-58        | STD               |
| 10.06                             | Phenylalanine            | 73-75-103-116-147-74-132-100-59-217  | STD               |
| 10.4                              | Asparagine               | 73-103-147-217-129-74-117-75-133-205 | STD               |
| 14.06                             | Tryptophan               | 73-202-75-131-74-203-116-59-100-55   | STD               |
| 16.29                             | Adenosine                | 73-129-75-103-74-217-147-230-236-55  | STD               |
| <i>Organic acid</i>               |                          |                                      |                   |
| 7.03                              | Pyruvate                 | 73-142-75-117-147-59-78-74-180-57    | STD               |
| 7.21                              | Nicotinic acid           | 73-142-75-147-59-143-74-72-66-58     | STD               |
| 7.34                              | Succinic acid            | 73-100-204-218-75-147-59-74-188-116  | STD               |
| 7.63                              | Maleic acid              | 73-147-75-245-100-74-143-59-83-148   | STD               |
| 8.92                              | Malonic acid             | 73-100-147-232-75-74-117-59-156-133  | STD               |
| 9.13                              | Salicylic acid           | 73-267-75-91-135-74-77-149-268-209   | STD               |
| 11.5                              | Citric acid              | 73-103-147-217-75-74-59-89-129-133   | STD               |
| <i>Sugar &amp; Sugar alcohols</i> |                          |                                      |                   |
| 0.37                              | Xylose                   | 73-116-75-74-132-147-100-141-59-188  | STD               |
| 10.71                             | Xylitol                  | 73-103-147-217-129-117-74-75-205-133 | STD               |
| 11.9                              | Fructose                 | 73-147-103-160-74-75-129-117-205-217 | STD               |
| 11.97                             | Fructose                 | 73-103-147-217-74-75-133-59-117-89   | STD               |
| 12.22                             | Glucose                  | 73-202-75-131-74-203-116-59-100-55   | STD               |
| 12.77                             | Gluconic acid            | 73-147-103-74-117-75-217-205-133-129 | STD               |
| 13.34                             | myo-inositol             | 73-147-217-191-103-129-74-133-75-318 | STD               |
| 16.43                             | Sucrose                  | 73-103-147-217-129-74-75-169-117-361 | STD               |
| 16.86                             | Maltose                  | 73-75-147-103-217-129-74-59-361-204  | STD               |

<sup>a</sup> Retention time; <sup>b</sup> Identified metabolites basend on VIP > 0.7 and a *p*-value < 0.05 from the PLS-DA model; <sup>c</sup> Standard compound.
